# Supplementary material for: Uptake of a plasticizer (di-n-butyl phthalate) impacts the biochemical and physiological responses of barley
Source: PeerJ. 2022 Feb 14;10:e12859. doi: 10.7717/peerj.12859 (PMC8852270; doi:10.7717/peerj.12859)
Supplement: Supplemental Information 4 [file peerj-10-12859-s004.xlsx]

## Sheet: RAF
Conc. (mg/kg)	Control	800	1600	2400		Control	800	1600	2400		Control	800	1600	2400		Control	800	1600	2400
	0	0.0768188	0.0682427	0.021216		0	0.0197648	0.0273936	0.0330748		0	0.225355	0.0334767	0.0231825		0	0.0188959	0.0214447	0.00843554
	0	0.0541089	0.0895428	0.014153		0	0.0206635	0.0219186	0.0269359		0	0.300258	0.0662379	0.0375111		0	0.0187298	0.0188408	0.0232415
	0	0.221216	0.179702	0.00807011		0	0.0320176	0.0395596	0.0305268		0	0.556004	0.0451496	0.0685427		0	0.0278065	0.0222646	0.0174913
Mean	0	0.117381	0.112496	0.0144797		0	0.0241486	0.0296239	0.0301792		0	0.360539	0.0482881	0.0430788		0	0.0218108	0.0208501	0.0163895
SD	0	0.0906376	0.0591684	0.00657905		0	0.00682953	0.00902953	0.00308416		0	0.173371	0.0166045	0.023187		0	0.00519316	0.00178768	0.00746423
SE	0	0.0523297	0.0341609	0.00379842		0	0.00394303	0.0052132	0.00178064		0	0.100096	0.00958664	0.013387		0	0.00299827	0.00103212	0.00430948
	0= ND	Not detected

## Sheet: SAF
Conc. (mg/kg)	Control	800	1600	2400		Control	800	1600	2400		Control	800	1600	2400		Control	800	1600	2400
	0	0.0788278	0.0165939	0.0116326		0	0.0273175	0.038318	0.017056		0	0.0301559	0.272161	0.0254267		0	0.00922792	0.00703958	0.00748036
	0	0.0349265	0.00460092	0.00883611		0	0.0493403	0.0278465	0.0164429		0	0.0250334	0.194302	0.0147929		0	0.00675082	0.00186967	0.00243211
	0	0.0437519	0.00826451	0.0100043		0	0.0564742	0.0272437	0.0322907		0	0.0296731	0.196986	0.0199616		0	0.0117557	0.00471859	0.00428551
Mean	0	0.0525021	0.00981978	0.0101577		0	0.0443773	0.0311361	0.0219299		0	0.0282875	0.22115	0.0200604		0	0.0092448	0.00454262	0.00473266
SD	0	0.0232219	0.0061459	0.00140452		0	0.0151987	0.00622706	0.00897801		0	0.0028284	0.0441974	0.00531756		0	0.00250247	0.00258944	0.00255366
SE	0	0.0134072	0.00354834	0.0008109		0	0.00877497	0.00359519	0.00518345		0	0.00163298	0.0255174	0.0030701		0	0.0014448	0.00149502	0.00147436
	0= ND	Not detected

## Sheet: TF
Conc. (mg/kg)	Control	800	1600	2400		Control	800	1600	2400		Control	800	1600	2400		Control	800	1600	2400
	0	1.02615	0.254341	0.548291		0	1.38213	1.3988	0.515678		0	0.133815	8.12984	1.09681		0	0.488355	0.328266	0.886767
	0	0.645485	0.160567	0.624328		0	2.3878	1.27045	0.610445		0	0.0833731	2.93339	0.394361		0	0.360432	0.0992352	0.104645
	0	0.197779	0.794129	1.23968		0	1.76385	0.688674	1.05778		0	0.0533685	4.36297	0.291229		0	0.422766	0.211932	0.245008
Mean	0	0.623139	0.403012	0.804099		0	1.84459	1.11931	0.727968		0	0.0901855	5.14207	0.594132		0	0.423851	0.213145	0.41214
SD	0	0.414638	0.341947	0.379133		0	0.507673	0.37842	0.28953		0	0.0406536	2.6844	0.438371		0	0.0639685	0.11452	0.416988
SE	0	0.239392	0.197423	0.218893		0	0.293105	0.218481	0.16716		0	0.0234714	1.54984	0.253094		0	0.0369322	0.0661183	0.240748

## Sheet: Seed AF, TF
	Seed AF					Seed TF
Conc. (mg/kg)	Control	800	1600	2400		Control	800	1600	2400
	0	0.0788278	0.0165939	0.0116326		0	4.39256	1.91428	2.52822
	0	0.0349265	0.00460092	0.00883611		0	5.98084	4.6983	3.21093
	0	0.0437519	0.00826451	0.0100043		0	5.0492	2.22405	2.22167
Mean	0	0.0525021	0.00981978	0.0101577		0	5.14087	2.94554	2.65361
SD	0	0.0232219	0.0061459	0.00140452		0	0.798096	1.52582	0.506412
SE	0	0.0134072	0.00354834	0.0008109		0	0.460781	0.880931	0.292377
