# Supplementary material for: Uptake of a plasticizer (di-n-butyl phthalate) impacts the biochemical and physiological responses of barley
Source: PeerJ. 2022 Feb 14;10:e12859. doi: 10.7717/peerj.12859 (PMC8852270; doi:10.7717/peerj.12859)
Supplement: Supplemental Information 5 [file peerj-10-12859-s005.xlsx]

## Sheet: TChl content
	Conc. (mg/kg)	Control	800	1600	2400		Control	800	1600	2400		Control	800	1600	2400		Control	800	1600	2400
		5.41992	5.5328	4.22906	3.59338		8.06008	3.77428	7.857	6.88624		9.40066	5.63324	5.65104	3.81618		1.88358	4.74088	3.86044	2.45926
		5.4722	6.4584	4.61938	4.0642		8.76824	6.37352	7.57896	5.47734		9.85128	5.40894	7.2667	3.57378		2.01992	5.18348	4.22284	2.84928
		5.5931	6.36572	4.80444	4.29382		9.1354	4.24926	5.04602	2.27776		10.0767	5.50964	6.8024	3.5414		2.18538	5.2319	4.21452	2.8576
		8.59862	4.96544	3.7624	4.90514		8.26148	12.9728	8.36762	1.4086		7.61006	4.73256	2.20974	4.51898		2.26974	10.3869	6.77512	2.2136
		8.90042	5.29932	4.2451	4.86474		8.45396	12.5453	8.57674	1.5497		8.39662	5.3118	2.45124	10.8349		2.62768	10.3182	4.82584	2.08468
		9.34302	5.20664	4.28936	5.2509		9.57684	11.92	9.44324	2.66812		7.86314	5.40448	2.49996	9.59292		2.8374	10.5357	4.68088	2.18954
		5.00554	4.53086	4.22906	4.11648		7.302	5.45646	3.17274	6.81316		7.75086	5.90322	2.47234	2.93038		3.2993	4.89802	6.32682	4.89832
		5.4523	5.31536	5.28534	4.38234		7.76926	6.41208	4.84612	6.42674		8.54814	6.99368	2.82286	3.78054		3.77162	4.84574	6.68892	4.89862
		5.34358	5.39616	4.91732	4.7082		8.09512	5.8548	2.56738	3.77286		8.17742	7.27974	2.42748	3.12316		3.67598	4.89862	6.81398	4.63752
	Mean	6.56986	5.4523	4.48683	4.46436		8.38026	7.72872	6.38398	4.14228		8.63055	5.79748	3.84486	5.07914		2.73007	6.78216	5.37882	3.23205
	SD	1.79996	0.616927	0.460503	0.513354		0.697486	3.67858	2.51827	2.28157		0.925049	0.823434	2.09404	2.96167		0.711956	2.72855	1.24573	1.21726
	SE	0.599987	0.205642	0.153501	0.171118		0.232495	1.22619	0.839424	0.760524		0.30835	0.274478	0.698014	0.987224		0.237319	0.909517	0.415242	0.405752

## Sheet: TCarotenoids content
	Conc. (mg/kg)	Control	800	1600	2400		Control	800	1600	2400		Control	800	1600	2400		Control	800	1600	2400
		5.41992	5.5328	4.22906	3.59338		8.06008	3.77428	7.857	6.88624		9.40066	5.63324	5.65104	3.81618		1.88358	4.74088	3.86044	2.45926
		5.4722	6.4584	4.61938	4.0642		8.76824	6.37352	7.57896	5.47734		9.85128	5.40894	7.2667	3.57378		2.01992	5.18348	4.22284	2.84928
		5.5931	6.36572	4.80444	4.29382		9.1354	4.24926	5.04602	2.27776		10.0767	5.50964	6.8024	3.5414		2.18538	5.2319	4.21452	2.8576
		8.59862	4.96544	3.7624	4.90514		8.26148	12.9728	8.36762	1.4086		7.61006	4.73256	2.20974	4.51898		2.26974	10.3869	6.77512	2.2136
		8.90042	5.29932	4.2451	4.86474		8.45396	12.5453	8.57674	1.5497		8.39662	5.3118	2.45124	10.8349		2.62768	10.3182	4.82584	2.08468
		9.34302	5.20664	4.28936	5.2509		9.57684	11.92	9.44324	2.66812		7.86314	5.40448	2.49996	9.59292		2.8374	10.5357	4.68088	2.18954
		5.00554	4.53086	4.22906	4.11648		7.302	5.45646	3.17274	6.81316		7.75086	5.90322	2.47234	2.93038		3.2993	4.89802	6.32682	4.89832
		5.4523	5.31536	5.28534	4.38234		7.76926	6.41208	4.84612	6.42674		8.54814	6.99368	2.82286	3.78054		3.77162	4.84574	6.68892	4.89862
		5.34358	5.39616	4.91732	4.7082		8.09512	5.8548	2.56738	3.77286		8.17742	7.27974	2.42748	3.12316		3.67598	4.89862	6.81398	4.63752
	Mean	6.56986	5.4523	4.48683	4.46436		8.38026	7.72872	6.38398	4.14228		8.63055	5.79748	3.84486	5.07914		2.73007	6.78216	5.37882	3.23205
	SD	1.79996	0.616927	0.460503	0.513354		0.697486	3.67858	2.51827	2.28157		0.925049	0.823434	2.09404	2.96167		0.711956	2.72855	1.24573	1.21726
	SE	0.599987	0.205642	0.153501	0.171118		0.232495	1.22619	0.839424	0.760524		0.30835	0.274478	0.698014	0.987224		0.237319	0.909517	0.415242	0.405752

## Sheet: Carbohydrate content
	Conc. (mg/kg)	Control	800	1600	2400		Control	800	1600	2400		Control	800	1600	2400		Control	800	1600	2400
		17.025	14.1	33.225	22.95		21.075	24.225	17.7	28.725		66.75	94.65	150.975	101.475		196.5	132.75	157.5	149.25
		14.025	15.225	34.65	30.15		23.325	18.675	19.05	31.35		93.675	116.325	151.95	136.875		173.25	165	159.75	153.75
		15.6	11.7	35.55	30.9		26.475	31.275	26.025	32.25		73.8	131.7	158.1	105.9		140.25	157.5	162.75	164.25
		16.65	13.2	11.925	22.275		15.9	18.3	25.125	12.9		85.65	60.375	33.225	134.025		153	174	107.25	197.25
		16.425	16.8	12.525	22.575		19.95	13.35	23.325	16.2		88.65	79.35	39.45	137.85		145.5	206.25	120	220.5
		11.625	19.575	14.775	22.725		17.475	17.25	15.75	12.525		87.825	73.725	45.15	121.05		138	183	117	217.5
		13.125	16.425	7.725	14.4		17.1	24.375	23.175	18		77.025	72.525	63.3	63.675		177.75	123	71.25	143.25
		13.95	15.6	10.2	13.65		19.35	26.625	19.05	18.375		100.725	78.675	60.9	71.475		179.25	144	54.75	128.25
		12.3	13.35	10.95	14.85		15.9	16.875	18.825	23.025		122.925	86.325	59.4	78.45		184.5	129.75	58.5	133.5
	Mean	14.525	15.1083	19.0583	21.6083		19.6167	21.2167	20.8917	21.4833		88.5583	88.1833	84.7167	105.642		165.333	157.25	112.083	167.5
	SD	1.98219	2.3497	11.7279	6.37075		3.5645	5.71053	3.58966	7.67891		16.5481	22.7126	52.712	29.0287		21.4214	27.6357	43.0664	35.3754
	SE	0.660729	0.783234	3.90929	2.12358		1.18817	1.90351	1.19655	2.55964		5.51602	7.57086	17.5707	9.67622		7.14046	9.21191	14.3555	11.7918

## Sheet: Protein content
	Conc. (mg/kg)	Control	800	1600	2400		Control	800	1600	2400		Control	800	1600	2400		Control	800	1600	2400
		0.441753	0.311007	0.32436	0.204742		0.786698	0.257596	0.239793	0.279851		0.507404	0.435076	0.320465	0.338269		0.132971	0.0645382	0.525207	0.186938
		0.442865	0.295985	0.329367	0.205855		0.793375	0.259265	0.241462	0.277625		0.488487	0.436189	0.322691	0.3366		0.131302	0.0628691	0.540785	0.182487
		0.441753	0.300436	0.334931	0.20808		0.776684	0.268724	0.246469	0.280407		0.495164	0.436189	0.319353	0.329924		0.142429	0.0689891	0.549687	0.179149
		0.41616	0.352735	0.175811	0.279295		0.52632	0.347727	0.229778	0.16524		0.383335	0.485705	0.417829	0.297098		0.215869	0.50184	0.376102	0.0879055
		0.426175	0.357185	0.171916	0.278738		0.509629	0.359967	0.235342	0.163015		0.376658	0.490156	0.41004	0.303218		0.209749	0.500727	0.366087	0.0906873
		0.243189	0.206469	0.10404	0.162663		0.521869	0.351622	0.231447	0.164684		0.376658	0.488487	0.408371	0.292647		0.211418	0.497945	0.373876	0.0945818
		0.274434	0.175225	0.138183	0.136251		0.70992	0.34884	0.236455	0.210862		0.418385	0.300993	0.487375	0.320465		0.136865	0.609775	0.219207	0.124069
		0.274434	0.175869	0.138505	0.135928		0.737738	0.350509	0.239793	0.2142		0.41616	0.294316	0.495164	0.308225		0.137978	0.614225	0.222545	0.117949
		0.276366	0.175869	0.138827	0.138183		0.727724	0.361636	0.23868	0.211975		0.413935	0.294316	0.485705	0.316015		0.140204	0.609775	0.221433	0.119618
	Mean	0.359681	0.261198	0.206216	0.194415		0.676662	0.322876	0.237691	0.218651		0.430687	0.406825	0.407444	0.315829		0.162087	0.392298	0.377215	0.131487
	SD	0.0887752	0.0772753	0.0948598	0.0566934		0.121265	0.0460977	0.00512019	0.0500287		0.0525679	0.0857864	0.0731713	0.0168087		0.0378746	0.24981	0.137703	0.0407011
	SE	0.0295917	0.0257584	0.0316199	0.0188978		0.0404216	0.0153659	0.00170673	0.0166762		0.0175226	0.0285955	0.0243904	0.00560291		0.0126249	0.08327	0.045901	0.013567

## Sheet: Proline content
	Conc. (mg/kg)	Control	800	1600	2400		Control	800	1600	2400		Control	800	1600	2400		Control	800	1600	2400
		15.4643	27.712	22.0211	28.2069		17.9344	21.1503	20.9029	43.4137		19.5424	41.5584	21.5213	33.5189		36.8584	25.603	34.8794	120.47
		13.6086	19.7943	18.186	25.6089		18.1818	27.2109	22.3871	46.7532		20.0371	27.3346	24.2424	31.2925		38.3426	33.5189	41.4348	130.118
		15.4643	20.2891	24.248	20.4129		18.0581	22.6345	23.3766	47.0006		22.1398	31.1688	22.1398	32.9004		35.7452	17.9344	39.5795	120.099
		16.5777	19.918	36.1246	38.2277		19.0476	28.2004	20.2845	36.3636		28.6951	33.5189	27.8293	28.8188		29.0662	51.8244	60.235	70.6246
		9.40229	21.1551	42.434	27.3409		19.295	36.24	19.9134	38.2189		27.3346	31.1688	28.6951	69.7588		20.4082	63.2035	61.5955	87.4459
		16.8251	26.3511	46.2691	28.578		19.1713	38.7137	21.645	39.2084		28.4477	31.7873	37.8479	58.9981		19.4187	57.0192	69.7588	83.859
		15.588	24.1243	28.578	26.3511		26.0977	19.295	19.666	29.1899		34.7557	34.0136	30.9215	20.1608		26.9635	48.3612	72.851	84.7248
		11.7529	20.2891	27.3409	42.6814		25.2319	34.0136	20.1608	27.953		35.8689	33.8899	31.4162	21.274		27.3346	91.7749	78.4168	83.6116
		13.1137	23.1346	29.5677	53.0734		24.9845	31.4162	29.5609	27.5819		32.282	38.8374	28.9425	22.1398		28.9425	95.4855	76.4378	56.4007
	Mean	14.1997	22.5297	30.5299	32.2757		20.8892	28.7638	21.9886	37.2982		27.6781	33.6975	28.1729	35.4291		29.2311	53.8583	59.4654	93.0392
	SD	2.45471	2.97072	9.35328	10.3145		3.45903	6.86849	3.09572	7.69568		6.07629	4.26183	5.10823	17.3745		6.76947	26.9368	16.817	24.9445
	SE	0.818235	0.990239	3.11776	3.43816		1.15301	2.2895	1.03191	2.56523		2.02543	1.42061	1.70274	5.79149		2.25649	8.97895	5.60568	8.31485

## Sheet: MDA content
	Conc. (mg/kg)	Control	800	1600	2400		Control	800	1600	2400		Control	800	1600	2400		Control	800	1600	2400
		9.24731	17.4194	14.6237	19.5699		24.5161	47.0968	50.3226	63.2258		58.7097	125.806	63.871	43.2258		204.516	65.1613	132.903	134.194
		10.7527	11.3978	13.7634	20		48.3871	46.4516	53.5484	53.5484		61.2903	127.097	64.5161	46.4516		235.484	76.129	148.387	141.29
		4.73118	10.1075	14.6237	18.7097		45.8065	52.2581	29.0323	73.5484		56.7742	126.452	67.0968	45.1613		240	68.3871	143.226	139.355
		15.4839	24.3011	13.5484	21.0753		30.9677	28.3871	53.5484	52.2581		90.9677	70.3226	56.7742	59.3548		140	110.968	209.032	110.968
		15.914	13.1183	18.2796	17.8495		56.129	30.9677	40.6452	92.9032		89.6774	74.1935	55.4839	60		156.129	119.355	232.258	101.935
		17.4194	13.3333	18.7097	40.4301		48.3871	29.0323	51.6129	52.2581		90.3226	71.6129	58.7097	62.5806		153.548	113.548	241.29	112.903
		15.6989	13.3333	13.1183	15.2688		38.0645	90.3226	58.7097	56.129		66.4516	54.8387	38.7097	42.5806		74.8387	87.0968	74.1935	121.935
		15.4839	14.1935	16.3441	17.2043		38.7097	34.1935	49.0323	59.3548		67.0968	53.5484	36.7742	43.871		80.6452	85.8065	71.6129	116.129
		15.914	12.9032	14.1935	15.4839		45.8065	35.4839	36.7742	62.5806		65.1613	53.5484	36.7742	41.2903		80	81.9355	70.9677	120
	Mean	13.405	14.4564	15.2449	20.6213		41.8638	43.7993	47.0251	62.8674		71.828	84.1577	53.19	49.3907		151.685	89.8208	147.097	122.079
	SD	4.21555	4.19462	2.05836	7.6823		9.77076	19.4793	9.53358	13.1632		14.2849	32.6892	12.4146	8.6082		65.061	20.0721	67.9957	13.5437
	SE	1.40518	1.39821	0.68612	2.56077		3.25692	6.4931	3.17786	4.38772		4.76163	10.8964	4.13819	2.8694		21.687	6.69071	22.6652	4.51456

## Sheet: H2O2 content
	Conc. (mg/kg)	Control	800	1600	2400		Control	800	1600	2400		Control	800	1600	2400		Control	800	1600	2400
		8.83333	10.3333	11.7778	14.5		8.27778	13.2222	9.05556	24.8889		17.3889	19.2222	21.5	27.7222		3.72222	29.6667	37.6667	27.5
		8.94444	11	10.6667	15.5		7.38889	8.61111	9.94444	25.3889		15.8333	19.7222	21.3889	27.5556		4.16667	31.5556	39.6111	29.7222
		9.33333	11.3889	10.4444	15.8333		7.22222	8.66667	9.83333	27.1111		19.1667	21.1111	22.1111	27.0556		6.05556	32.6667	37.6111	28.0556
		12.1111	14.9444	17.9444	7.61111		7.33333	4.61111	14.3333	28.5		6.22222	25.6111	29.0556	23.8333		4.16667	33.1667	40.4444	29.3889
		12.5556	15.5556	18.3333	7.88889		10.8333	5.72222	15.3333	29.4444		8.72222	26.3889	29.0556	23.8333		4.22222	32.9444	44.1111	25.8333
		12.6111	15.7222	18.3333	8		11.1111	4.33333	15.1667	29.6667		5.94444	26.5	28.5556	25.4444		5.22222	35.9444	39.7778	27
		8.72222	12.2778	12.7778	19.8333		7.33333	11.2222	20.7222	23.0556		15.5	15.4444	29.3889	30.4444		6.88889	33.9444	38.0556	26.4444
		9.55556	11.0556	12.5	20.8333		7.22222	11.5	20.3333	24		15.5	15.8333	31.1667	30.3333		5.11111	35.3333	38	28.3889
		10.8889	12.0556	12.2222	21.0556		7.72222	11.6667	19.6667	24		15.4444	17.2222	31.2222	32.1667		4.5	33.4444	38.2778	26.0556
	Mean	10.3951	12.7037	13.8889	14.5617		8.2716	8.83951	14.9321	26.2284		13.3025	20.784	27.0494	27.5988		4.89506	33.1852	39.284	27.5988
	SD	1.65609	2.1164	3.32789	5.56426		1.56802	3.31551	4.62463	2.51499		4.96221	4.42674	4.14396	2.95279		1.03206	1.87865	2.07915	1.40292
	SE	0.552029	0.705468	1.1093	1.85475		0.522672	1.10517	1.54154	0.838331		1.65407	1.47558	1.38132	0.984263		0.344022	0.626216	0.693051	0.467641

## Sheet: SOD activity
	Conc. (mg/kg)	Control	800	1600	2400		Control	800	1600	2400		Control	800	1600	2400		Control	800	1600	2400
		135.823	77.1686	82.2132	234.442		25.8164	86.4979	140.747	79.6194		39.4164	45.9689	66.867	63.3477		116.295	243.372	31.2133	91.7033
		60.2139	162.17	182.167	194.312		32.8717	85.9411	88.0056	131.215		43.8672	49.1268	66.4059	74.2721		118.384	245.97	29.3518	87.4442
		181.097	114.12	179.141	230.681		30.1517	87.1467	112.187	79.4614		47.3328	49.1268	78.2833	64.9501		107.465	224.15	28.8764	89.5499
		192.234	68.0398	151.678	122.758		42.3346	84.6154	113.499	167.336		65.2172	44.1184	65.2724	72.1262		71.8826	30.8144	41.9819	195.015
		62.5722	83.99	155.114	107.628		48.4223	76.8142	110.816	124.588		56.8913	51.0041	56.2797	76.1067		77.3125	31.0429	44.296	175.961
		109.654	116.24	230.681	491.814		42.6957	74.1693	106.622	108.874		53.0985	43.8672	52.4733	78.8558		128.999	31.2164	41.5754	166.066
		218.632	171.208	248.118	220.183		29.933	104.428	124.434	92.2365		55.1571	76.6694	43.9674	66.867		111.266	25.0757	71.2796	127.264
		109.316	136.465	216.598	588.545		30.2025	96.2885	131.106	249.169		51.4912	78.4086	50.4884	69.5224		111.5	25.0472	70.9494	132.472
		96.4903	170.581	216.096	434.206		29.8926	96.8878	127.356	134.494		55.7502	84.9426	47.1495	67.8088		109.171	25.1013	70.9326	131.308
	Mean	129.559	122.22	184.645	291.619		34.7023	88.0876	117.197	129.666		52.0247	58.137	58.5763	70.4285		105.808	97.9767	47.8285	132.976
	SD	56.7374	40.4129	50.8009	170.476		7.74218	9.69912	15.6009	53.1626		7.66798	16.7122	11.2648	5.26111		18.8585	105.091	18.3055	39.5119
	SE	18.9125	13.471	16.9336	56.8252		2.58073	3.23304	5.2003	17.7209		2.55599	5.57073	3.75495	1.7537		6.28615	35.0305	6.10183	13.1706

## Sheet: POD activity
	Conc. (mg/kg)	Control	800	1600	2400		Control	800	1600	2400		Control	800	1600	2400		Control	800	1600	2400
		0.0108457	0.0147049	0.0228279	0.0574382		0.0055365	0.0371986	0.0217966	0.0902703		0.02146	0.020022	0.0149505	0.03219		0.02146	0.020022	0.0149505	0.03219
		0.0142607	0.041939	0.01653	0.0243322		0.00439193	0.0302393	0.0126268	0.0847185		0.0133746	0.00698983	0.0161971	0.0271737		0.0133746	0.00698983	0.0161971	0.0271737
		0.0216914	0.0275451	0.0286095	0.0408176		0.00672947	0.0486249	0.0229734	0.0621318		0.0123147	0.00798838	0.0150026	0.0224429		0.0123147	0.00798838	0.0150026	0.0224429
		0.0214554	0.015435	0.0582191	0.0335289		0.00993059	0.0338196	0.0360154	0.076441		0.0113623	0.00807073	0.00938183	0.0161264		0.0113623	0.00807073	0.00938183	0.0161264
		0.0178852	0.00670676	0.0544709	0.0265642		0.00427326	0.0290397	0.0222088	0.0320626		0.0150328	0.00799745	0.0106223	0.0359111		0.0150328	0.00799745	0.0106223	0.0359111
		0.0331337	0.0400813	0.11722	0.0481978		0.0100153	0.0260128	0.0376376	0.0476064		0.0185019	0.00356657	0.00319971	0.0491149		0.0185019	0.00356657	0.00319971	0.0491149
		0.030155	0.0198855	0.0504323	0.0767214		0.0122706	0.0237231	0.0571028	0.0826239		0.00936935	0.0130236	0.00268103	0.0217461		0.00936935	0.0130236	0.00268103	0.0217461
		0.0365035	0.029719	0.0518873	0.0865161		0.016531	0.0584039	0.145311	0.0976035		0.0209321	0.0251581	0.00967581	0.0296752		0.0209321	0.0251581	0.00967581	0.0296752
		0.0330962	0.0247658	0.0509826	0.0803764		0.0143644	0.0397453	0.101279	0.0904092		0.0152574	0.0192386	0.00627724	0.0254981		0.0152574	0.0192386	0.00627724	0.0254981
	Mean	0.0243363	0.0245314	0.0501311	0.0527214		0.00933811	0.0363119	0.0507724	0.073763		0.0152895	0.0124506	0.00977645	0.0288754		0.0152895	0.0124506	0.00977645	0.0288754
	SD	0.00919548	0.0117233	0.0294252	0.023785		0.00444107	0.0112515	0.044444	0.0220285		0.00423214	0.00735598	0.00502534	0.00961643		0.00423214	0.00735598	0.00502534	0.00961643
	SE	0.00306516	0.00390775	0.00980839	0.00792832		0.00148036	0.00375049	0.0148147	0.00734283		0.00141071	0.00245199	0.00167511	0.00320548		0.00141071	0.00245199	0.00167511	0.00320548

## Sheet: CAT activity
	Conc. (mg/kg)	Control	800	1600	2400		Control	800	1600	2400		Control	800	1600	2400		Control	800	1600	2400
		0.0124481	0.0262952	0.0250388	0.053441		0.00896151	0.0172968	0.018581	0.0145106		0.0114489	0.00933353	0.0200633	0.0205079		0.0381738	0.117977	0.0144971	0.0301704
		0.0145182	0.0510674	0.0293672	0.0510972		0.00753541	0.0311079	0.0161168	0.0323011		0.0102758	0.00620648	0.0227214	0.0202745		0.0584181	0.0825334	0.00959493	0.0185438
		0.00153208	0.00150182	0.00185232	0.0027105		0.00827827	0.0245561	0.0304346	0.0227284		0.0124153	0.00943903	0.0183672	0.00940218		0.0455384	0.0743944	0.00933695	0.022982
		0.0110453	0.0193471	0.0441099	0.0349352		0.014145	0.0217343	0.0301909	0.0395933		0.0139773	0.00905734	0.00904389	0.0218312		0.0295234	0.0187685	0.0250432	0.0731422
		0.0160132	0.0266063	0.0557713	0.0376353		0.0138336	0.0150414	0.0210893	0.0584709		0.0187172	0.0126572	0.0165057	0.0184145		0.0395272	0.0144174	0.0197199	0.0914219
		0.0275982	0.0351016	0.0859227	0.0618911		0.0130768	0.0198896	0.0294858	0.0424669		0.0164712	0.0172033	0.0157445	0.0211996		0.0442838	0.0169898	0.0226278	0.0453195
		0.0446993	0.0445792	0.0706106	0.0430501		0.0131085	0.0187547	0.0238524	0.0569719		0.0188725	0.0138661	0.00972066	0.0156635		0.0391479	0.0100818	0.0280447	0.0675059
		0.0237369	0.0347951	0.0490682	0.0377581		0.0110852	0.0228491	0.0279892	0.0287003		0.0116551	0.0170551	0.00546728	0.0150046		0.0527301	0.00991688	0.0273706	0.0793766
		0.0440806	0.0461797	0.0542357	0.0563252		0.0120128	0.0201186	0.0258748	0.0428372		0.0153966	0.0156179	0.0076639	0.0152594		0.0450545	0.0100355	0.0276355	0.0741434
	Mean	0.0217413	0.0317193	0.0462196	0.0420937		0.0113375	0.0212609	0.0248461	0.0376201		0.0143589	0.0122707	0.013922	0.0175064		0.0435997	0.0394572	0.0204301	0.0558451
	SD	0.0148264	0.0153764	0.0251008	0.0174863		0.00250635	0.00466946	0.00527747	0.0146949		0.00318748	0.00395072	0.00609298	0.00403457		0.00846519	0.0409305	0.00758571	0.0269972
	SE	0.00494212	0.00512545	0.00836693	0.00582877		0.000835449	0.00155649	0.00175916	0.0048983		0.00106249	0.00131691	0.00203099	0.00134486		0.00282173	0.0136435	0.00252857	0.00899906

[truncated: 2 more sheets: APX activity, GR activity]
