# Supplementary material for: Uptake of a plasticizer (di-n-butyl phthalate) impacts the biochemical and physiological responses of barley
Source: PeerJ. 2022 Feb 14;10:e12859. doi: 10.7717/peerj.12859 (PMC8852270; doi:10.7717/peerj.12859)
Supplement: Supplemental Information 6 [file peerj-10-12859-s006.xlsx]

## Sheet: Dry weight
		15 days					30 days					60 days					120 days
	Conc. (mg/kg)	Control	800	1600	2400		Control	800	1600	2400		Control	800	1600	2400		Control	800	1600	2400
		0.0353	0.02665	0.0317	0.031		0.0975	0.0488	0.0438	0.049		1.2509	0.3207	0.1141	0.076		2.3923	0.7034	0.2076	0.1556
		0.0316	0.0225	0.0317	0.0294		0.09	0.0465	0.0309	0.0878		0.499	0.2307	0.1224	0.0672		1.527	0.3917	0.2584	0.1728
		0.0285	0.026	0.0317	0.0335		0.1191	0.0383	0.0695	0.0225		0.4534	0.096	0.0552	0.0514		1.4454	0.2705	0.186	0.1177
	Mean	0.0318	0.02505	0.0317	0.0313		0.1022	0.0445333	0.0480667	0.0531		0.734433	0.2158	0.0972333	0.0648667		1.78823	0.4552	0.217333	0.1487
	SD	0.00340441	0.00223215	0	0.0020664		0.0151086	0.00551936	0.0196505	0.0328425		0.447854	0.113089	0.0366377	0.0124649		0.524726	0.223327	0.0371684	0.0281906
	SE	0.00196554	0.00128873	0	0.00119304		0.00872296	0.0031866	0.0113452	0.0189616		0.258569	0.0652917	0.0211528	0.0071966		0.302951	0.128938	0.0214592	0.0162759

## Sheet: NPP
		15 days					30 days					60 days					120 days
	Conc. (mg/kg)	Control	800	1600	2400		Control	800	1600	2400		Control	800	1600	2400		Control	800	1600	2400
		0.00235333	0.00177667	0.00211333	0.00206667		0.00325	0.00162667	0.00146	0.00163333		0.0208483	0.005345	0.00190167	0.00126667		0.0199358	0.00586167	0.00173	0.00129667
		0.00210667	0.0015	0.00211333	0.00196		0.003	0.00155	0.00103	0.00292667		0.00831667	0.003845	0.00204	0.00112		0.012725	0.00326417	0.00215333	0.00144
		0.0019	0.00173333	0.00211333	0.00223333		0.00397	0.00127667	0.00231667	0.00075		0.00755667	0.0016	0.00092	0.000856667		0.012045	0.00225417	0.00155	0.000980833
	Mean	0.00212	0.00167	0.00211333	0.00208667		0.00340667	0.00148444	0.00160222	0.00177		0.0122406	0.00359667	0.00162056	0.00108111		0.0149019	0.00379333	0.00181111	0.00123917
	SD	0.000226961	0.00014881	0	0.00013776		0.00050362	0.000183979	0.000655018	0.00109475		0.00746423	0.00188481	0.000610629	0.000207748		0.00437271	0.00186106	0.000309737	0.000234922
	SE	0.000131036	8.59155e-05	0	7.95357e-05		0.000290765	0.00010622	0.000378175	0.000632054		0.00430948	0.0010882	0.000352547	0.000119943		0.00252459	0.00107448	0.000178827	0.000135632

## Sheet: Seed weight
		Seed weight
		0	800	1600	2400
		4.03	4.43	1.56	1.37
		6.45	3.46	1.15	0.35
		2.24	3.6	1.55	0.58
		9.85	3.76	3.24	1.78
		9.23	2.35	2.51	3.28
		5.67	5.73	1.35	1.52
		2.94	3.47	4.32	4.72
		8.68	1.3	6.3	0.3
		7.71	4.8	1.61	1.26
		5.07	3.15	7.27	3.76
		7.57	3.93	3.5	1.23
		8.07	3.77	6.52	3.92
		5.58	7.92	12.57	1.84
		1.34	6.24	1.04	0.66
		6	4.14	0.99	1.86
		7.75	8.47	9.32	1.31
		9.9	3.62	2.97	1.53
		7.39	1.43	6.78	0.86
		8.89	4.24	6.48	0.82
		7.74	2.91	3.9	0.78
		7.75	7.9	3.36	1.19
		4.51	1.91	2.01	2.23
		6.64	3.31	5.27	0.8
		2.67	4.86	5.1	1.21
		9.05	6.25	1.49	1.33
		1.61	4.86	1.25	0.94
		4.75	1.65	2.5	2.03
		7.67	1.65	0.7	0.71
		5.91	2.01	4.31	1.09
		8.07	5.73	1.67	0.8
	Mean	6.35767	4.095	3.753	1.53533
	SD	2.45166	1.93073	2.82052	1.07936
	SE	0.44761	0.352501	0.514955	0.197063

## Sheet: Seed number
		Seed number
		0	800	1600	2400
		36	18	3	9
		42	15	10	4
		42	9	15	6
		36	18	15	5
		30	6	12	4
		42	9	12	12
		42	30	12	4
		30	18	12	6
		20	12	12	9
		30	18	2	8
		30	12	18	4
		20	12	18	12
		42	12	8	6
		36	18	20	6
		30	18	20	6
		20	12	11	5
		42	12	20	4
		42	12	30	4
		20	12	5	5
		36	18	20	5
		24	9	36	4
		20	12	3	5
		18	12	18	4
		20	12	8	6
		18	18	6	3
		20	12	16	4
		30	20	9	4
		24	5	5	9
		12	9	12	5
		30	30	9	5
		30	9	5	12
		20	9	12	6
		24	12	9	9
		24	24	9	5
		30	12	8	5
		30	36	5	5
		18	24	7	6
		30	12	9	42
		24	12	7	5
		36	24	5	6
		30	9	12	12
		30	9	6	4
		42	8	3	9
		18	12	20	12
		30	8	5	4
	Mean	28.8889	14.4444	11.5333	7
	SD	8.46979	6.63515	7.08584	5.93143
	SE	0.39927	0.312784	0.33403	0.27961
